# Supplementary figures and images for: Carcinoma-associated fibroblast-like tumor cells remodel the Ewing sarcoma tumor microenvironment
Source: PubMed Central journal article supplement — bioRxiv. 2023 Apr 13:2023.04.12.536619. Preprint. [Version 1] doi: 10.1101/2023.04.12.536619 (PMC10120623; doi:10.1101/2023.04.12.536619), 2023-04-13

# Figure S1

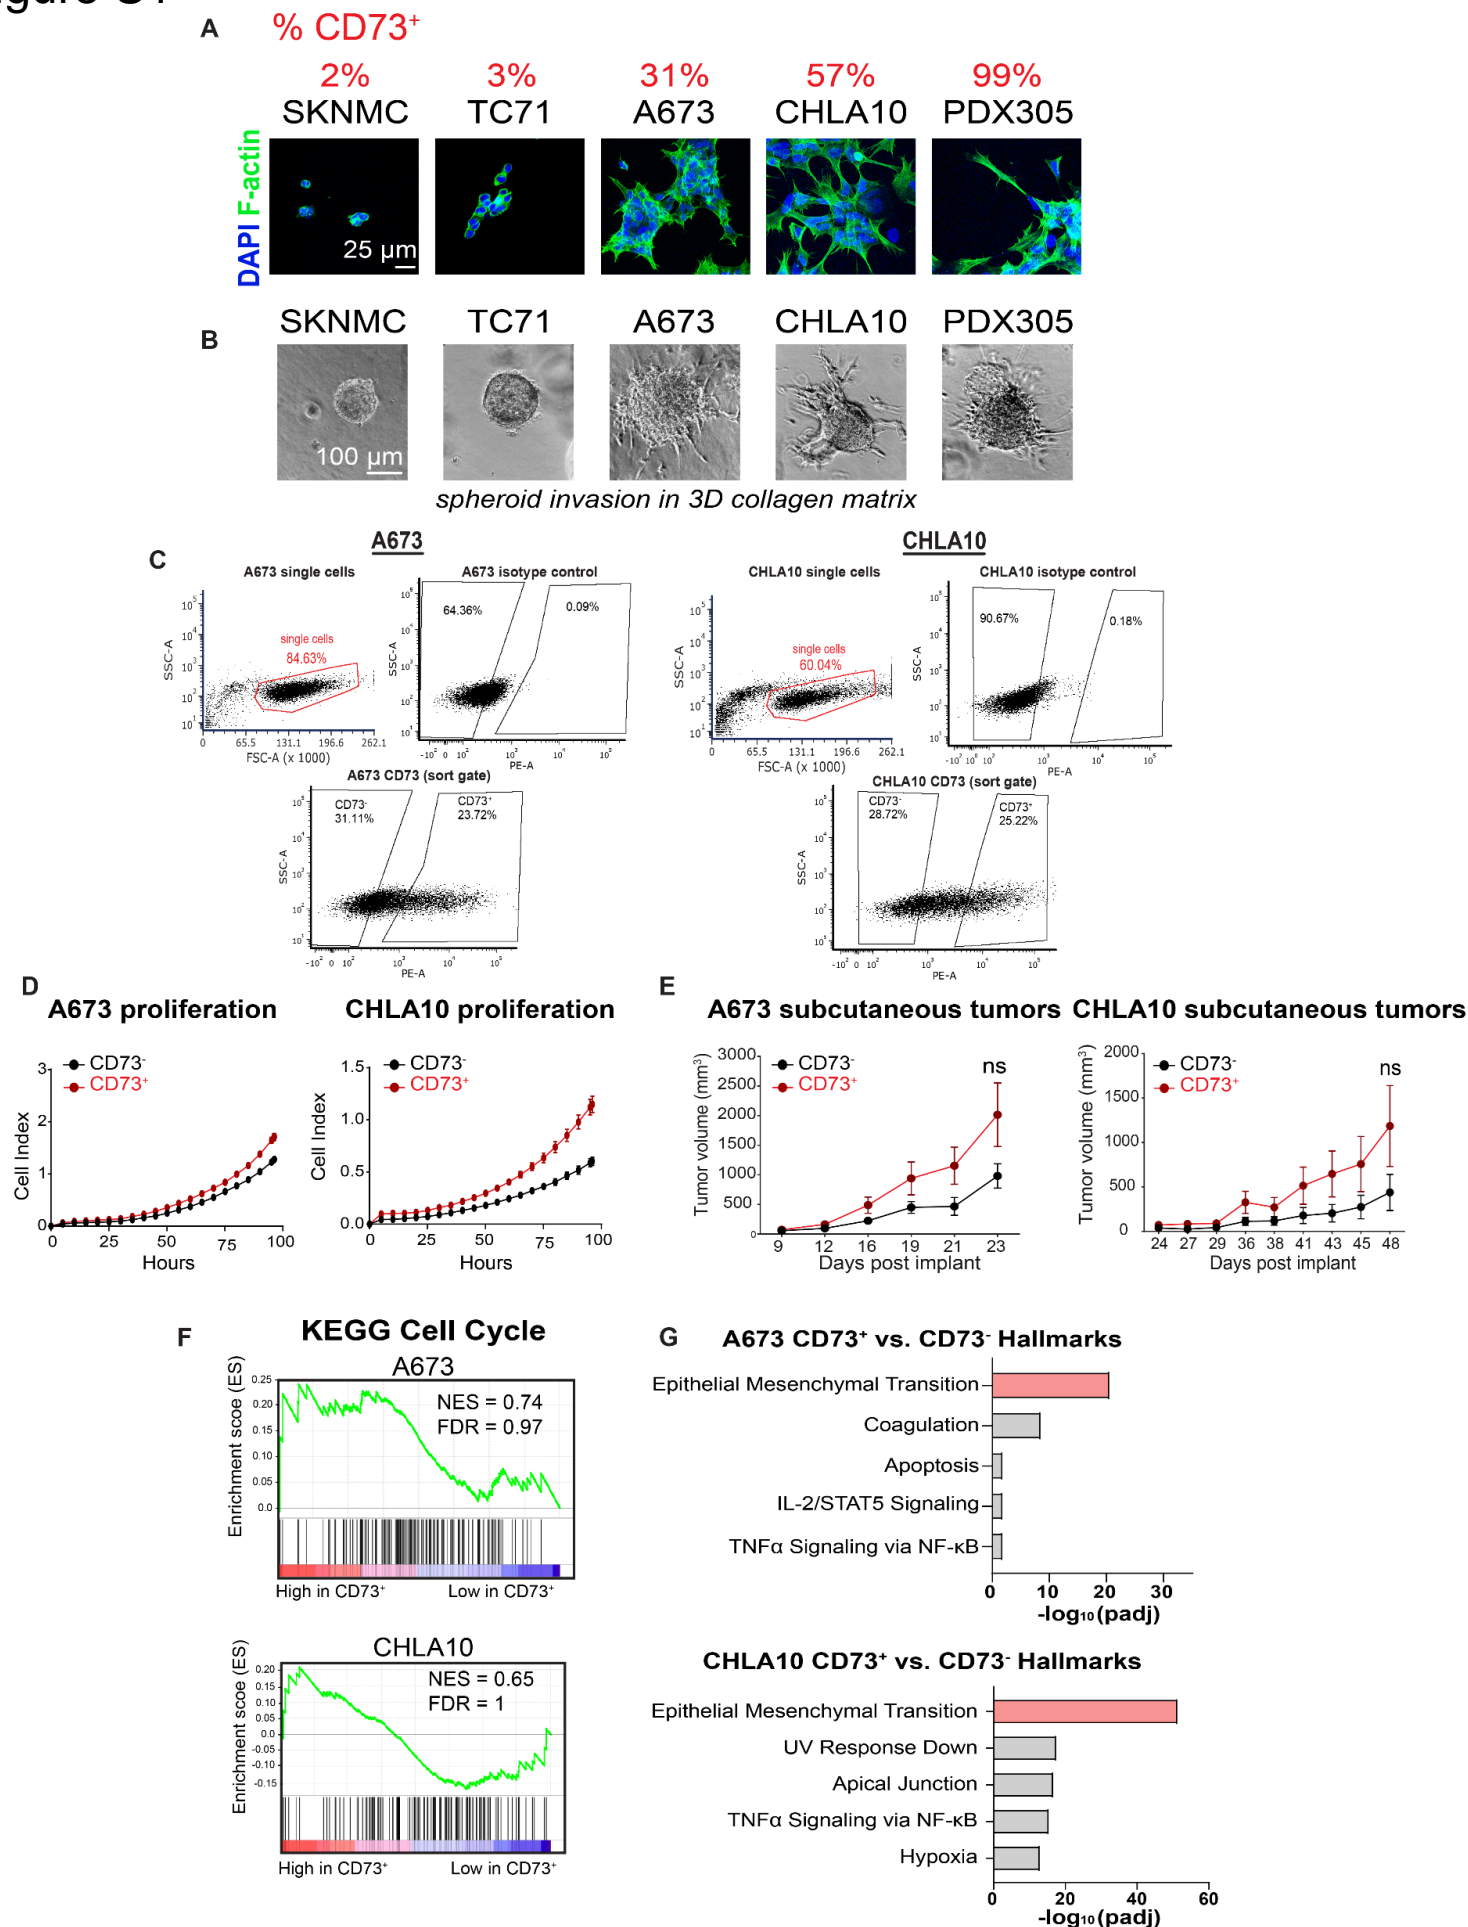

## Figure S2

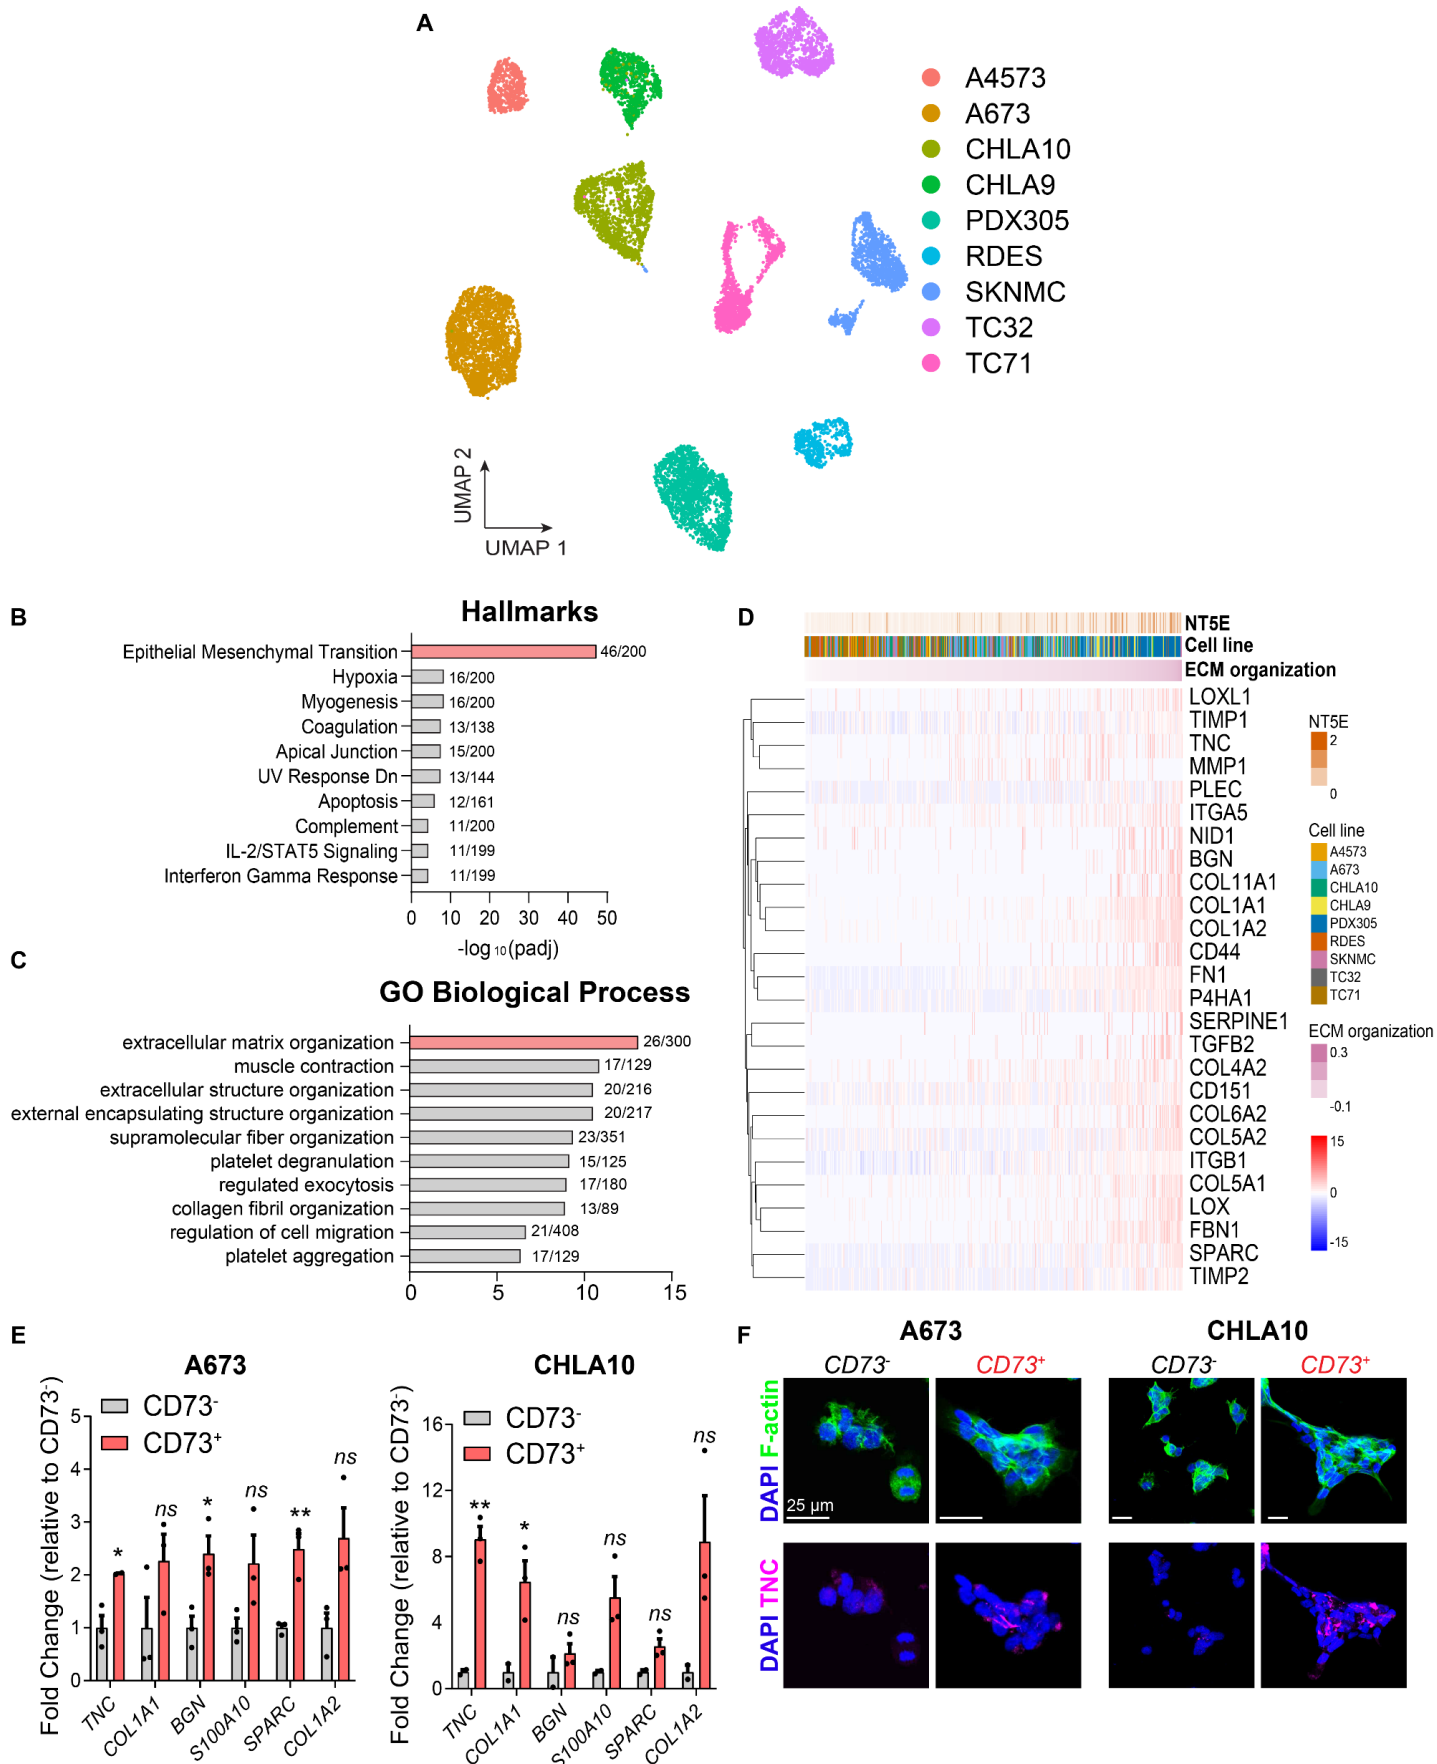

## Figure S3

### A A673 (SUBQ)

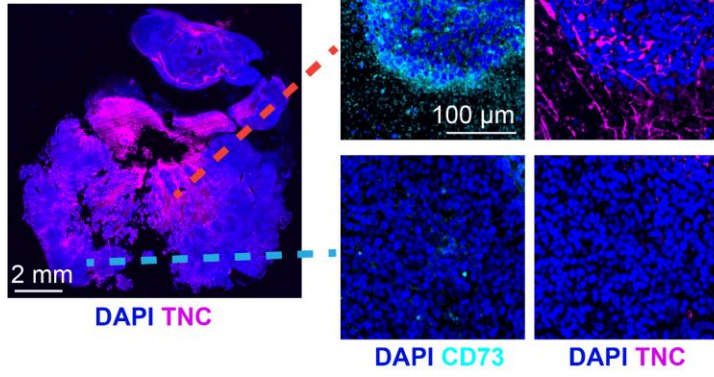

### B PDX305 (SUBQ)

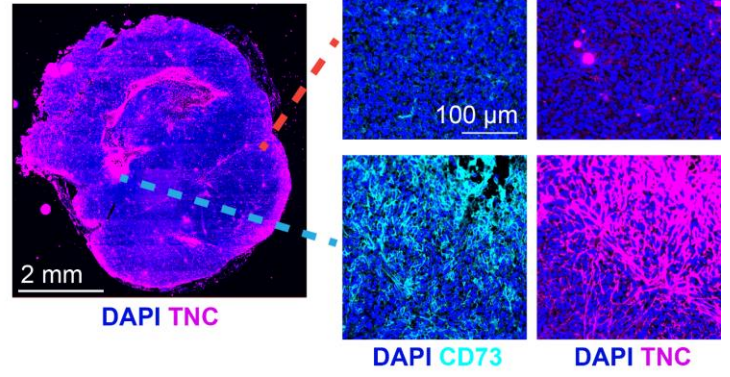

## Figure S4

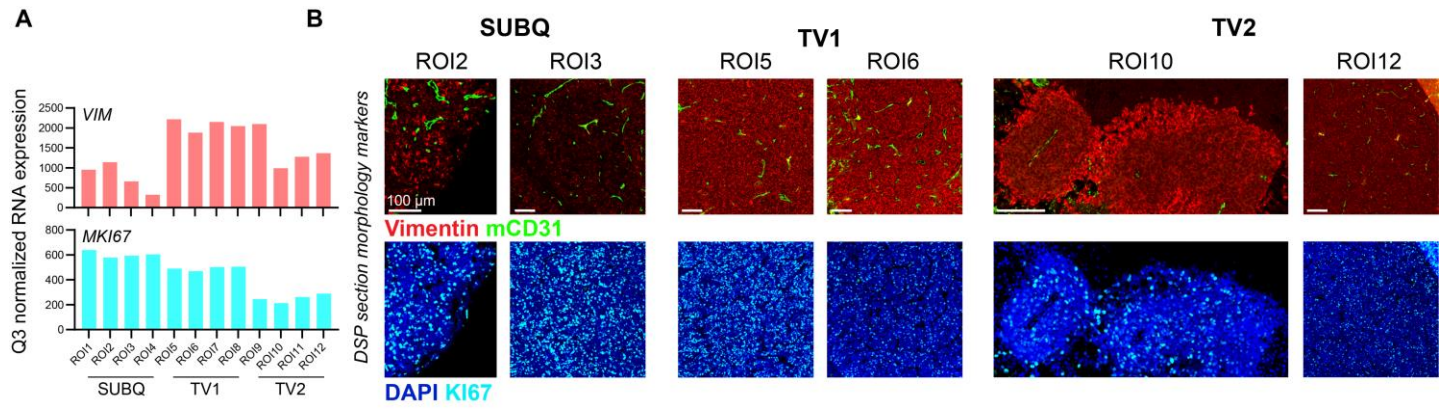

## Figure S5

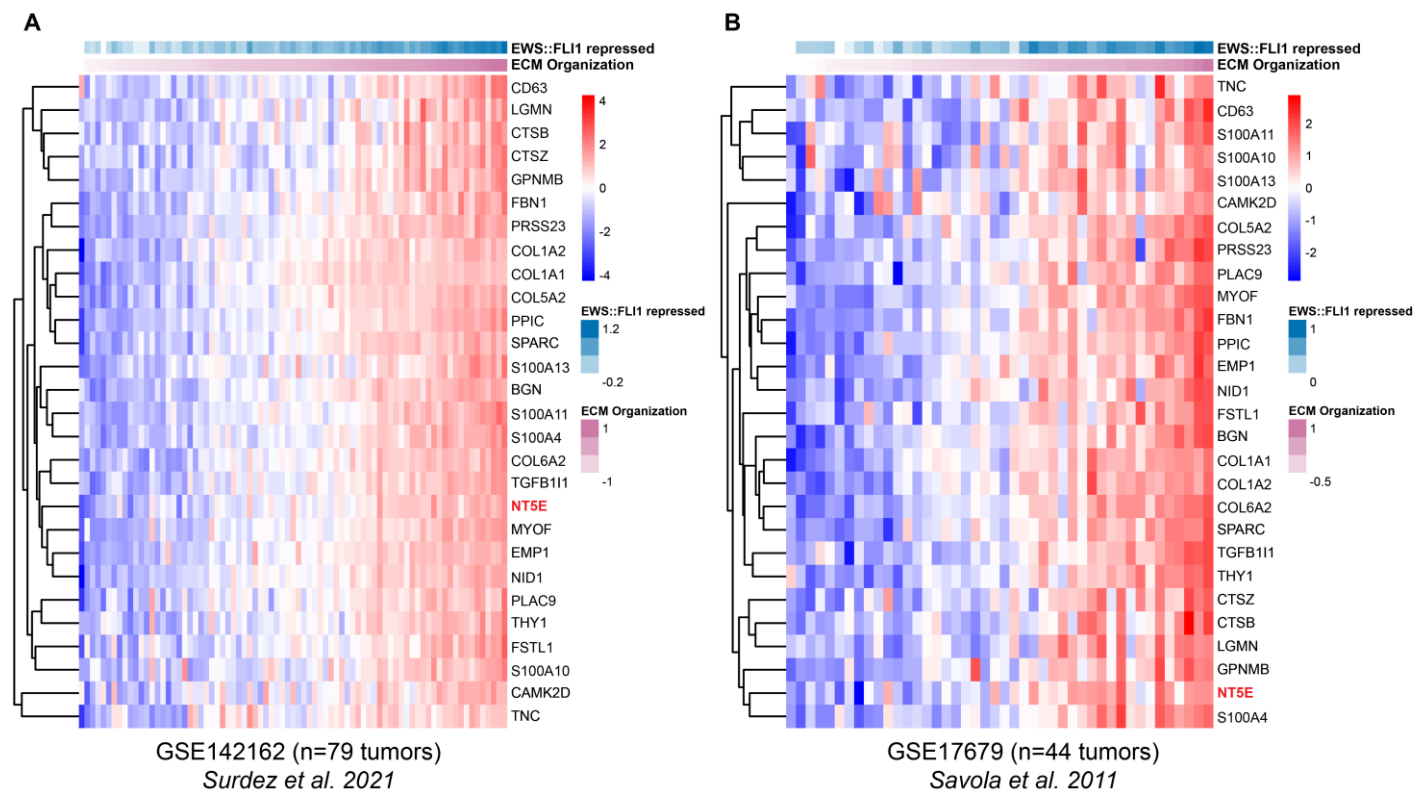



## Figure S6

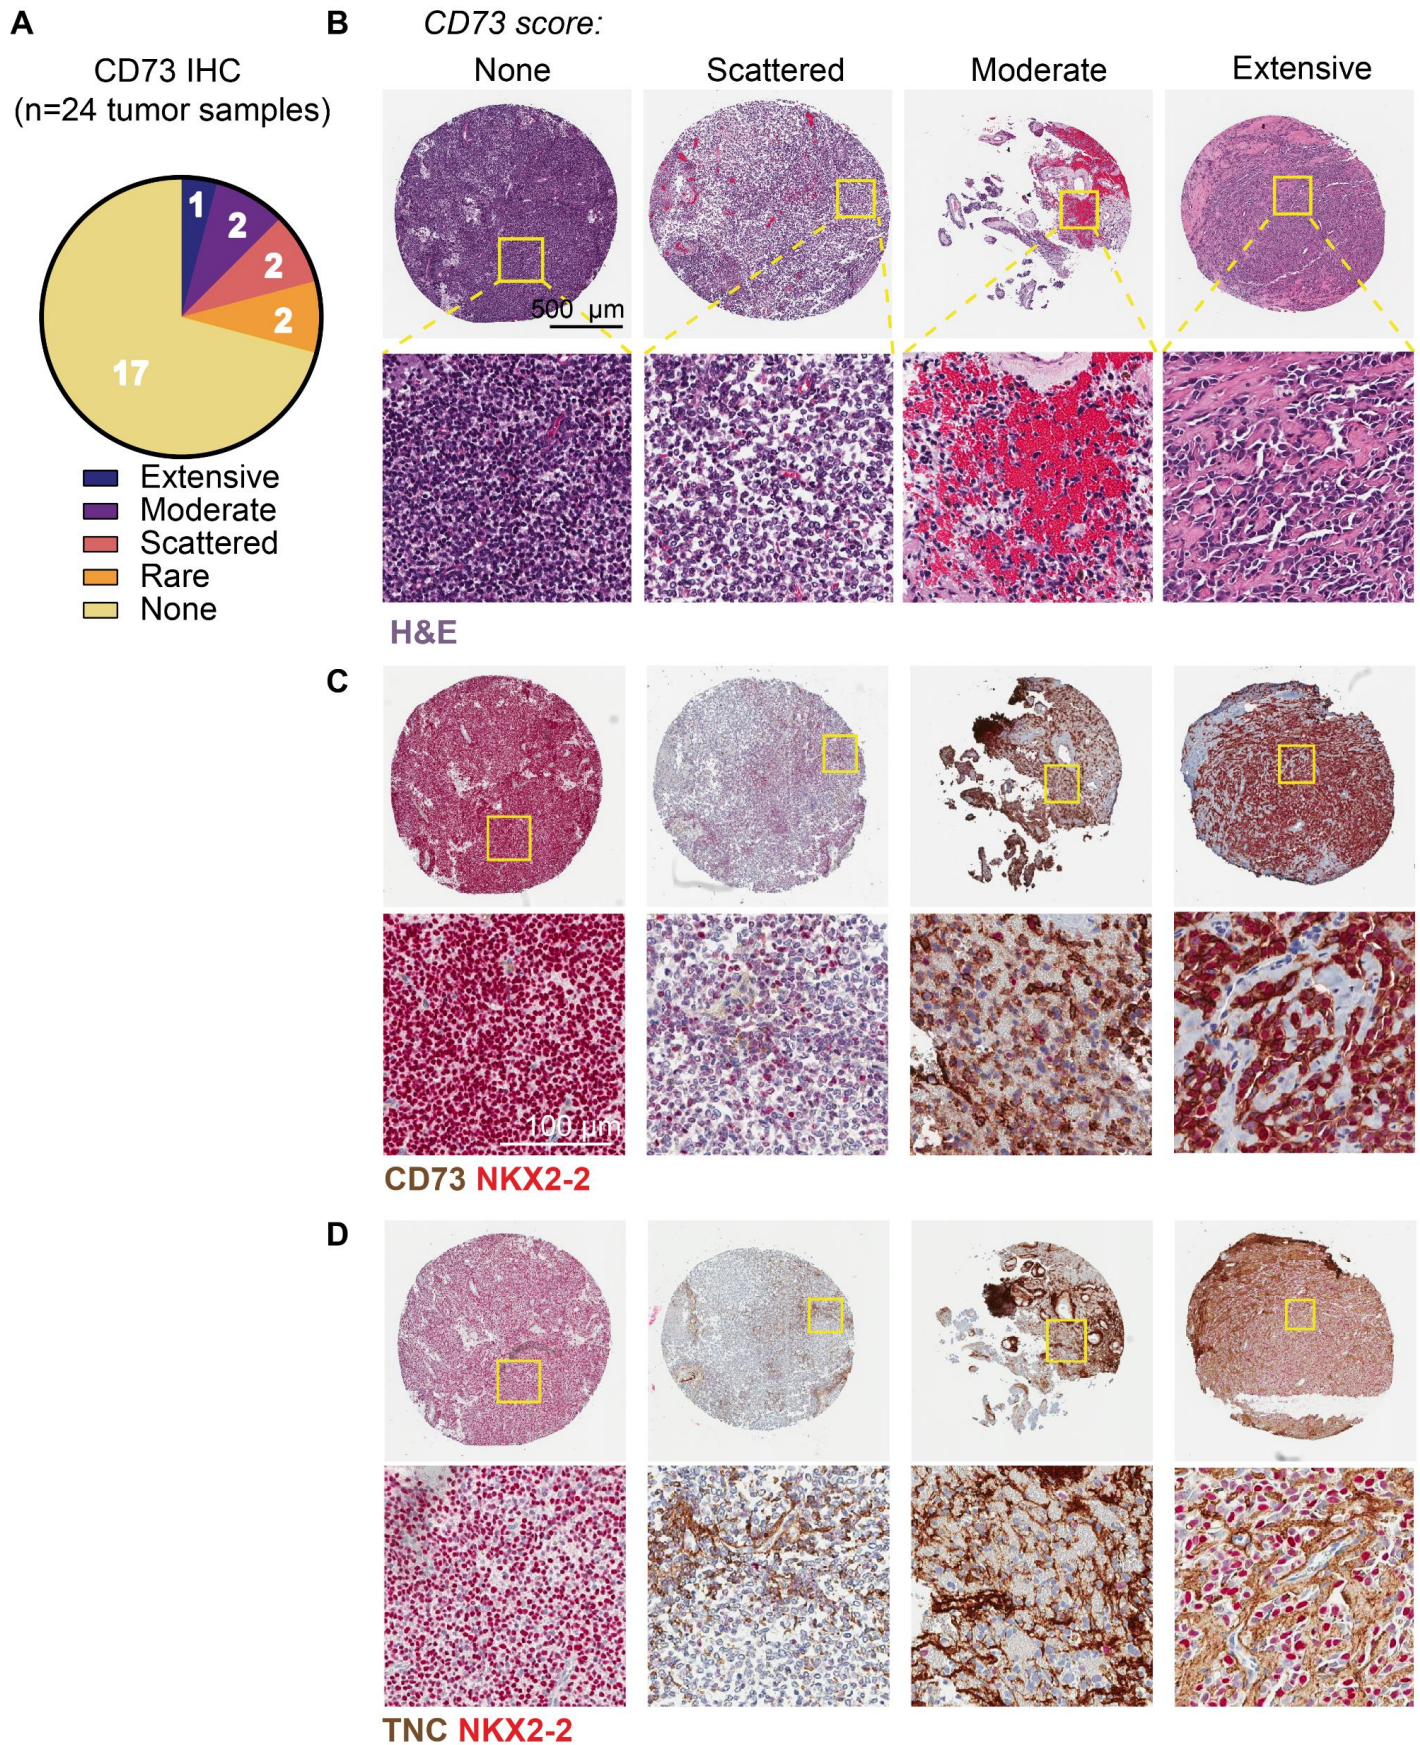

Supplement: NIHPP2023.04.12.536619v1-supplement-7.pdf [file NIHPP2023.04.12.536619v1-supplement-7.pdf]
